# Supplementary material for: Immune-enhancement effects of oligosaccharides from Codonopsis pilosula on cyclophosphamide induced immunosuppression in mice
Source: Royal Society of Chemistry journal article supplement (doi:10.1039/c9fo02969a), 2020-01-01
Supplement: c9fo02969a1.pdf [file c9fo02969a1.pdf]

## Supplementary materials

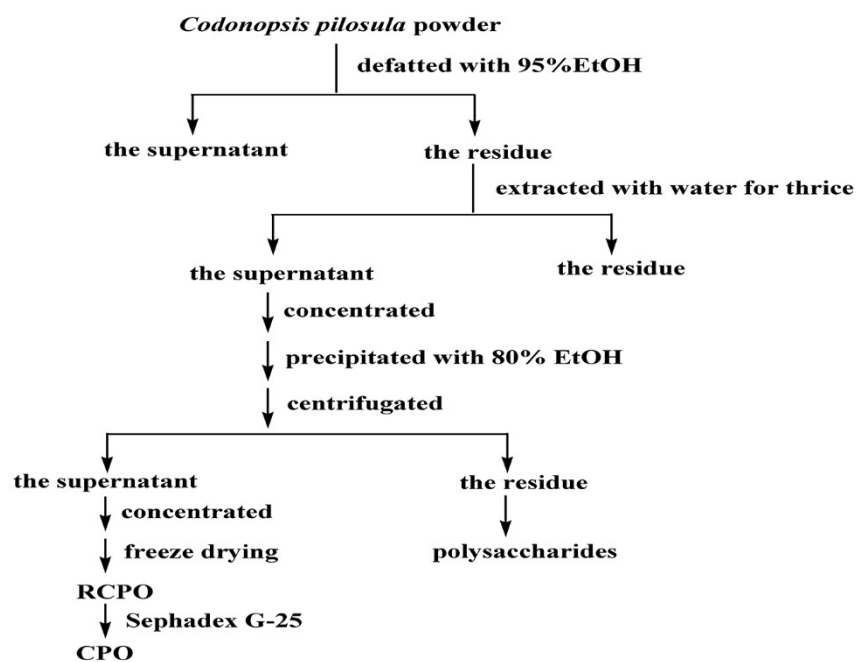

Fig S1. Scheme of isolation and purification of CPO from *Codonopsis pilosula*.
